# Supplementary material for: Hierarchical molecular tagging to resolve long continuous sequences by massively parallel sequencing
Source: PubMed Central journal article supplement (PMC3592332; doi:10.1038/srep01186), 2013-03-08
Supplement: srep01186-s1.pdf [file srep01186-s1.pdf]

# Supplementary material

## **Hierarchical molecular tagging to resolve long continuous sequences by massively parallel sequencing**

Sverker Lundin<sup>1</sup>, Joel Gruselius<sup>1</sup>, Björn Nystedt<sup>2</sup>, Preben Lexow<sup>3</sup>, Max Käller<sup>1</sup>, Joakim Lundeberg<sup>1,\*</sup>

<sup>1</sup> Science for Life Laboratory, KTH, Gene Technology, Solna, 171 65, Sweden

<sup>2</sup> Science for Life Laboratory, Stockholm University, Department of Biochemistry and Biophysics, Stockholm, 106 91, Sweden

<sup>3</sup> LingVitae AS, Husøysund, 3132, Norway

\* to whom correspondence should be addressed.

## **Supplementary discussion**

### **Chimeras**

We detected unexpectedly high levels of chimeras when we examined the TP-tag junctions in the raw data. Our first hypothesis was that they were caused by intermolecular ligation during circularization. We lowered amounts and compared to blunt end ligation and cre recombinase based systems using data from another study (Akan P., et al, manuscript submitted). In this study blunt-end ligation circularization had a chimera frequency of around 2% and cre recombinase < 1%. Further the fragment concentration during circularization did not affect the chimeric frequency found in this protocol. We therefore concluded that the circularization was not the major contributor of this phenomenon. We suspect that the library PCR causes the elevated levels of chimeras, with the hypothesis being that the secondary structure of the circularization hairpin obscures the activity of the polymerase, causing it to stall or dislodge.

## **Bias of the transposase**

Some interesting aspects of the transposase based library preparation (Nextera, Epicentre now Illumina) was discovered in this study. The transposase in the kit is a variant of the Tn5 transposase<sup>1</sup> and has been characterized for high throughput sequencing applications<sup>2</sup>. We noticed a clear preference in binding to the circularization adapter. This is highly undesirable as those fragments will not produce the information incorporated in the library. Roughly, the average length of the dsDNA circles to be prepared for sequencing is 1500 bp for targets of 3000 bp, assuming a uniform distribution. The adapter is 46 bp, and digestion inside the adapter should by chance happen in approximately 2-4% of the sequences. Instead 12% of the sequences begin with the circularization adapter, and the pattern of digestion is clearly non-stochastic (Figure S4). The reported recognition sequence for Tn5 is A-GNTYWRANC-T<sup>1</sup> and if we align this motif to our adapter, the best match (82%) is indeed the highest noted insertion site (position 22, Figure S4). This is contrasted to a previously noted low bias of transposition. When we compare to a human shotgun sample generally a low bias is seen, as is the case for all the raw data in this study (Figure S5). Although a general low bias is seen per position on a global scale, particular sequences can be quite strongly biased.

## Supplementary tables

**Table S1. Tile-seq throughput.**

The theoretical output is based on a typical amount of reads obtained from one lane of Illumina HiSeq2000 sequencing, one of the 2x100 bp reads is used for classifying the construct (reading indices). The current throughput is approximated based on the mapped non-duplicated reads of the data, average read length and average amount of bases that could be generated in a typical run.

|                          | <b>Theoretical Throughput</b> | <b>Current throughput</b> |
|--------------------------|-------------------------------|---------------------------|
| <b>Reads</b>             | 150000000                     | 255000                    |
| <b>read length</b>       | 100                           | 45                        |
| <b>bases decoded</b>     | 15000000000                   | 11475000                  |
| <b>amplicon length</b>   | 3000                          | 3000                      |
| <b>amplicons at 1x</b>   | 5000000                       | 3825                      |
| <b>amplicons at 30x</b>  | 166667                        | 128                       |
| <b>amplicons at 100x</b> | 50000                         | 38                        |

**Table S2. Comparison of Tile-seq and Sanger sequencing**

Cost comparison between Tile-seq and Sanger sequencing. This is a simplified example of a sequencing project containing 96, 3kb amplicons, either sequenced by Tile-seq as described in this report, or by 600 bp Sanger reads in both directions. This example is included to provide an overview of the protocol as compared to the established protocol of Sanger sequencing. Polymer consumption of Sanger sequencing is not considered in this example. If the same amplicon is prepared, 107 oligos (96 forward, 1 reverse, 2 universal and 8 adapters) is needed for Tile-seq and 8 for Sanger (each used as sequence primers). This example assumes low complexity samples (e.g. two alleles), known reference sequence within the amplicon, and unproblematic sequence (e.g. no long homopolymer stretches). If these criteria would not be fulfilled, cloning or sequence primer iterations will be required for Sanger but would not impact the Tile-seq protocol. Tile-seq would produce approximately 40x average coverage, and the Sanger protocol is used to read five 600 bp regions in both directions (2x). The manually intensive steps of Tile-seq is the first PCRs, and for Sanger sequencing setting up the Big Dye reactions and the subsequent ethanol preparations (960 in total). The purifications of Tile-seq, in total 244, are automated and cost approximately \$0.1 per reaction.

| Tile-seq                   |                     |                    |             | Sanger           |                     |                    |             |
|----------------------------|---------------------|--------------------|-------------|------------------|---------------------|--------------------|-------------|
| Type of reaction           | Number of reactions | Price per reaction | Total price | Type of reaction | Number of reactions | Price per reaction | Total price |
| PCR I                      | 96                  | \$1.00             | \$96.00     | PCR              | 96                  | \$1.00             | \$96.00     |
| PCR II                     | 96                  | \$1.00             | \$96.00     | Big Dye*         | 960                 | \$15.00            | \$14,400.00 |
| USER                       | 1                   | \$5.00             | \$5.00      |                  |                     |                    |             |
| <b>A</b>                   |                     |                    |             |                  |                     |                    |             |
| <b>U</b> Exo III           | 1                   | \$6.00             | \$6.00      |                  |                     |                    |             |
| <b>T</b> S1                | 1                   | \$0.50             | \$0.50      |                  |                     |                    |             |
| <b>O</b> End Repair        | 8                   | \$1.00             | \$8.00      |                  |                     |                    |             |
| <b>M</b> Methyltransferase | 8                   | \$0.40             | \$3.20      |                  |                     |                    |             |
| <b>A</b> Ligation          | 8                   | \$5.00             | \$40.00     |                  |                     |                    |             |
| <b>T</b> Exonucleases      | 8                   | \$2.00             | \$16.00     |                  |                     |                    |             |
| <b>E</b> EcoRI             | 8                   | \$0.10             | \$0.80      |                  |                     |                    |             |
| <b>D</b>                   |                     |                    |             |                  |                     |                    |             |
| Circularization            | 1                   | \$12.00            | \$12.00     |                  |                     |                    |             |
| Exonucleases               | 1                   | \$2.00             | \$2.00      |                  |                     |                    |             |
| Nextera                    | 1                   | \$150.00           | \$150.00    |                  |                     |                    |             |
| PCR                        | 1                   | \$1.00             | \$1.00      |                  |                     |                    |             |
| Lane HiSeq2000             | 1                   | \$1,250.00         | \$1,250.00  |                  |                     |                    |             |
| Total                      |                     |                    | \$1,686.50  |                  |                     |                    | \$14,496.00 |
| Coverage                   |                     |                    | 40 x        |                  |                     |                    | 2 x         |

Prices estimated from list prices of each respective supplier used in the manuscript unless stated below

\* Price estimated from list price at Life Technologies

**Table S3. Lambda Primers**

| <b>ID-tag</b> | <b>Name</b> | <b>Primer</b>                                         |
|---------------|-------------|-------------------------------------------------------|
| AGCTGATG      | lbd_fo_1;   | TGCGTCGAGAGCTCAGCCAGAGCTGATGCGACCTCGCGGGTTTTTCGCT     |
| TATCGATG      | lbd_fo_2;   | TGCGTCGAGAGCTCAGCCAGTATCGATGATCTCAGTGCCTGGTGGCG       |
| ATGCGATG      | lbd_fo_3;   | TGCGTCGAGAGCTCAGCCAGATGCGATGCTGCAGTCCCGGATGGACGC      |
| ACGTCATG      | lbd_fo_4;   | TGCGTCGAGAGCTCAGCCAGAGCTATGGGGAGGGCGCTGTGGCTGATT      |
| TCATGTCG      | lbd_fo_5;   | TGCGTCGAGAGCTCAGCCAGTATGTCGTTGCCCTGAAACTGGCGCGT       |
| TAGCGTCG      | lbd_fo_6;   | TGCGTCGAGAGCTCAGCCAGTAGCGTTCGATTGGCGGGGCTGTGGTGG      |
| TCTACTCG      | lbd_fo_7;   | TGCGTCGAGAGCTCAGCCAGTCTACTCGTGGTGGCGCAGATGCTGG        |
| ATGACTCG      | lbd_fo_8;   | TGCGTCGAGAGCTCAGCCAGATGACTCGCGGTGGGGCAGCGATGATG       |
| ATCTATCG      | lbd_fo_9;   | TGCGTCGAGAGCTCAGCCAGATCTATCGTGCAGCTTCCCTGGCAACGG      |
| ACAGATCG      | lbd_fo_10;  | TGCGTCGAGAGCTCAGCCAGAGATCGCGTTTCTGCAAGCTTGGCTGTATAGT  |
| ATACTGCG      | lbd_fo_11;  | TGCGTCGAGAGCTCAGCCAGATACTGCGTGACCGTAGGACTTTCCACATGCAG |
| TATATGCG      | lbd_fo_12;  | TGCGTCGAGAGCTCAGCCAGTATATGCGTACCAACTCGTTGCCCGGT       |
| TGCTCGCG      | lbd_fo_13;  | TGCGTCGAGAGCTCAGCCAGTCTCGCGACATGCCGATTGCCAGGCTT       |
| ATCGCGCG      | lbd_fo_14;  | TGCGTCGAGAGCTCAGCCAGATCGCGGAGCGTCGACGGCTTACGAAA       |
| TAGTAGCG      | lbd_fo_15;  | TGCGTCGAGAGCTCAGCCAGTAGTAGCGTTTGGGGCGGATCGTGAGGC      |
| AGATAGCG      | lbd_fo_16;  | TGCGTCGAGAGCTCAGCCAGAGATAGCGCCCGCTCTTACACATTCAGCCC    |
| TGTGAGCG      | lbd_fo_17;  | TGCGTCGAGAGCTCAGCCAGTGTGAGCGATGGCATGGTCGCTGGCTGG      |
| TCACAGCG      | lbd_fo_18;  | TGCGTCGAGAGCTCAGCCAGTACAGCGGGTCTTAATGGCGGTGGCT        |
| ACTGTACG      | lbd_fo_19;  | TGCGTCGAGAGCTCAGCCAGACTGTACGCAACAGGCGCCGGACGCTAC      |
|               | lbd_re_1;   | GTCCCTGCGTCGCTGTGTC                                   |
|               | lbd_re_2;   | TCAGCTGCGAAGCAGTGGC                                   |
|               | lbd_re_3;   | CCCTTTCAGCGGCGACGGTT                                  |
|               | lbd_re_4;   | GGGCCAAAGCGGACACCTCC                                  |
|               | lbd_re_5;   | ATCTGCCCGTTCGTGCCGTC                                  |
|               | lbd_re_6;   | CTTCGCTTCGCGGGGTAT                                    |
|               | lbd_re_7;   | GCTGAGGCCAATACCCGCGA                                  |
|               | lbd_re_8;   | CCGCATCCTCAAGCGCGACA                                  |
|               | lbd_re_9;   | TGGGTGACGATGTGATTTTCGCC                               |
|               | lbd_re_10;  | TGAACCACAGATTCAAGTGGACGATG                            |
|               | lbd_re_11;  | CAAGCGCGCTCAGCCAAGT                                   |
|               | lbd_re_12;  | TGGTGGCGAAAGCAGAAGCA                                  |
|               | lbd_re_13;  | GGCCGCTGAGTGCCTTTT                                    |
|               | lbd_re_14;  | GGAAGCAGAACGCGCCGACT                                  |
|               | lbd_re_15;  | TTGTGCGCCAATCGAGCCA                                   |
|               | lbd_re_16;  | TGCCCGTCGCTTTTGTCCA                                   |
|               | lbd_re_17;  | AGATGAACGTGTCCGCGCT                                   |
|               | lbd_re_18;  | CAGCGGTGTCTGCCAGTCGG                                  |
|               | lbd_re_19;  | CGGATCACGGAAAGGACCCG                                  |
|               | outer_U     | TGCGUCGAGAGCTCAGCC*A*G                                |

**Table S4. TP53 and Canine-primers**

| <b>ID-tag</b>              | <b>Name</b>   | <b>Primer</b>                                              |
|----------------------------|---------------|------------------------------------------------------------|
| <b>Canine Mitochondria</b> |               |                                                            |
| ACGAGACG                   | mtDogVU1_fo7; | CGACGTAACACGACGGCCAGTNNNNNNNNNNNNNACGAGACCGCCCTTAGCCAATGCC |
|                            | mtDogV_re7;   | CACACAGAAACAGCTATGACCATGATCCCGTGGGGGTGTGGCTT               |
| <b>P53</b>                 |               |                                                            |
| ATGTGTAG                   | p53_VU1_fo;   | CGACGTAACACGACGGCCAGTNNNNNNNNNNNNATGTGTAGCAGCCAGACTGCCTCCG |
| ACTCGTAG                   | p53_VU2_fo;   | CGACGTAACACGACGGCCAGTNNNNNNNNNNNNACTCGTAGCAGCCAGACTGCCTCCG |
| TGCAGTAG                   | p53_VU3_fo;   | CGACGTAACACGACGGCCAGTNNNNNNNNNNNTGCAGTAGCAGCCAGACTGCCTCCG  |
| TGATCTAG                   | p53_VU4_fo;   | CGACGTAACACGACGGCCAGTNNNNNNNNNNNTGATCTAGCAGCCAGACTGCCTCCG  |

p53\_V\_re; CACACAGGAAACAGCTATGACCATGTGCCCAATTGCAGGTAAAAAC

**General Primers**

Out-VU-fo CGACGUAAAACGACGGCCA\*G\*T

Out-V\_re CACACAGGAAACAGCTATGACCA\*T\*G

\*=phosphorothioate modification

**Table S5. Circularization adapter design**

|                |                                                                    |
|----------------|--------------------------------------------------------------------|
| TES-HP5-B_TPT1 | GTGACTACCGAAAAGGGTTTGAATCCGACTTTTTGTGCGGAATCAAACCCCTTZCGGTAGTCACT  |
| TES-HP5-B_TPT2 | GTCTGAACCGAAAAGGGTTTGAATCCGACTTTTTGTGCGGAATCAAACCCCTTZCGGTTCACT    |
| TES-HP5-B_TPT3 | GTTGACACCGAAAAGGGTTTGAATCCGACTTTTTGTGCGGAATCAAACCCCTTZCGGTGTCACT   |
| TES-HP5-B_TPT4 | GTA CTGACCGAAAAGGGTTTGAATCCGACTTTTTGTGCGGAATCAAACCCCTTZCGGTCAGTACT |
| TES-HP5-B_TPT5 | GTGCATACCGAAAAGGGTTTGAATCCGACTTTTTGTGCGGAATCAAACCCCTTZCGGTATGCACT  |
| TES-HP5-B_TPT6 | GTCGTAACCGAAAAGGGTTTGAATCCGACTTTTTGTGCGGAATCAAACCCCTTZCGGTTACGACT  |
| TES-HP5-B_TPT7 | GTTAGCACCGAAAAGGGTTTGAATCCGACTTTTTGTGCGGAATCAAACCCCTTZCGGTGCTA ACT |
| TES-HP5-B_TPT8 | GTATCGACCGAAAAGGGTTTGAATCCGACTTTTTGTGCGGAATCAAACCCCTTZCGGTCGATACT  |

Z=internally biotinylated T

**Table S6. Nextera Amplification Primers**

IL-NextAdaptor1 AATGATACGGCGACCACCGAGATCTACACGCTCCCTCGCGCCATCAG

nxt-idx6 CAAGCAGAAGACGGCATACGAGATCG[ATTGGC]GTCTGCCTTCCAGCCCGCTCAG

[index]=could be varied for multiplexing purposes

**Table S7. TP53 Sanger sequencing primers**

|          |                      |
|----------|----------------------|
| P53_1_fo | GGTGAGGATGGGCTCCGGT  |
| P53_1_re | AGGCAGGCGGATCACGAGGT |
| P53_2_fo | AACCCACAGCTGCACAGGGC |
| P53_2_re | TTAGCCAGGCATGGTGGTGC |

**Supplementary figure legends**

Figure S1. Unidirectional exonuclease III degradation. 1% agarose gel analysis of exonuclease III degradation of differently prepared constructs. 1. Unidirectional degradation expected by uracil incorporation and subsequent USER treatment. 2. Same construct as 1 but no USER treatment (degradation in both ends expected). 3. Uracil incorporated in both ends and USER treatment (no degradation expected). 4. SacI restriction site incorporated in 1 end and SacI treatment (unidirectional degradation expected).

Figure S2. Time-point tag occurrence after mapping to the lambda amplicon references. The mapped position of each respective TP-tag detected of each amplicon is plotted using a Gaussian kernel density approximation (R). Plots indicate amplicon dependent variation but generally a distinguished order. TP8 omitted due to generally low detection levels.

Figure S3. Frequency (y-axis) of reads beginning with the adapter in the raw data, counted per starting position (x-axis) in the adapter. The plot shows a transposase

induced bias in adapter fragmentation. Dots indicate variable positions due to the TP-tag, and the last 11 bp were not included in the query due to the rise of unspecific hits.

Figure S4. Weblogo plots on the base distribution of the 12 first bases of raw data from Nextera prepared libraries. Left and middle shows a typical human shotgun sample with expected random distribution, right shows Tile-seq data. Left plot shows probability over base position, and middle and left shows bits (0.0-0.3) over base position. All plots indicate slight bias supporting the recognition sequence of Tn5.

**Figure S1**

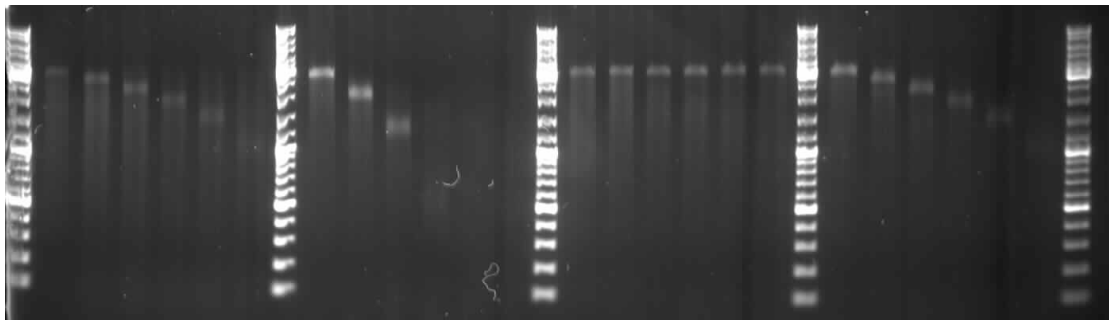

1

2

3

4

**Figure S2**

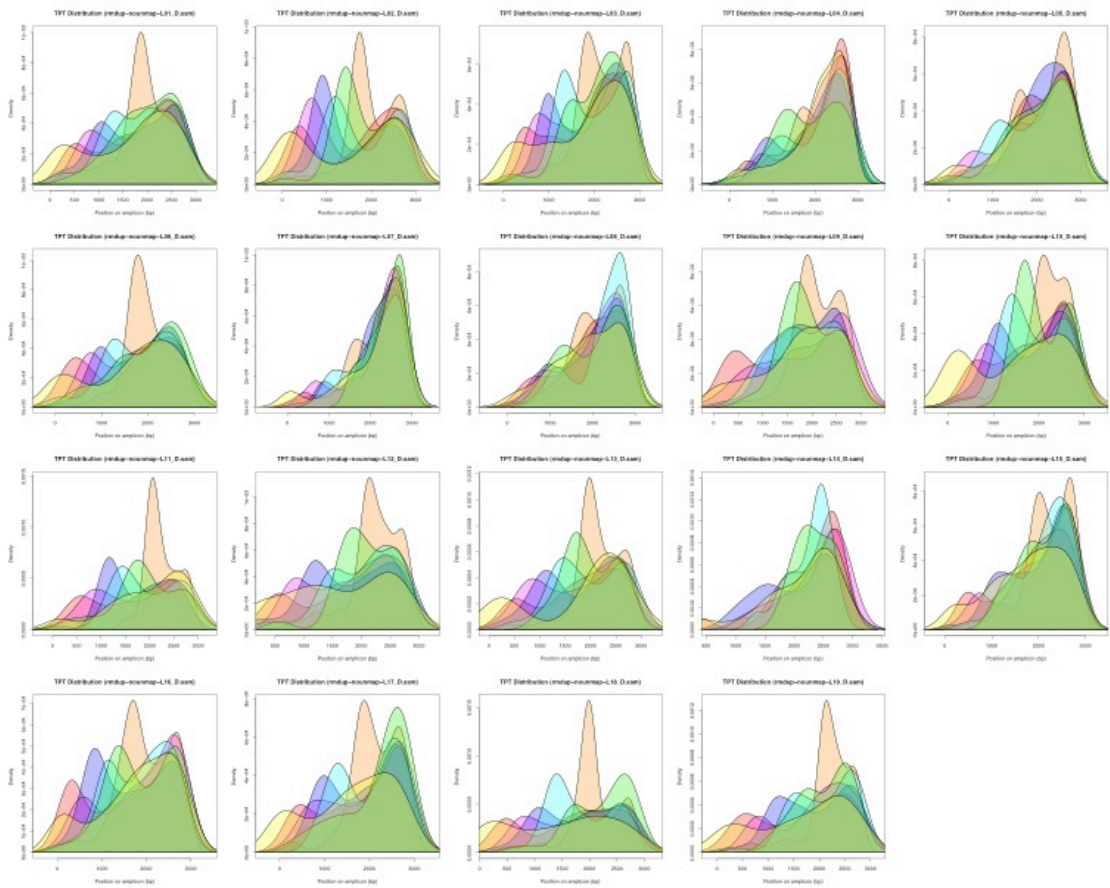

Figure S3

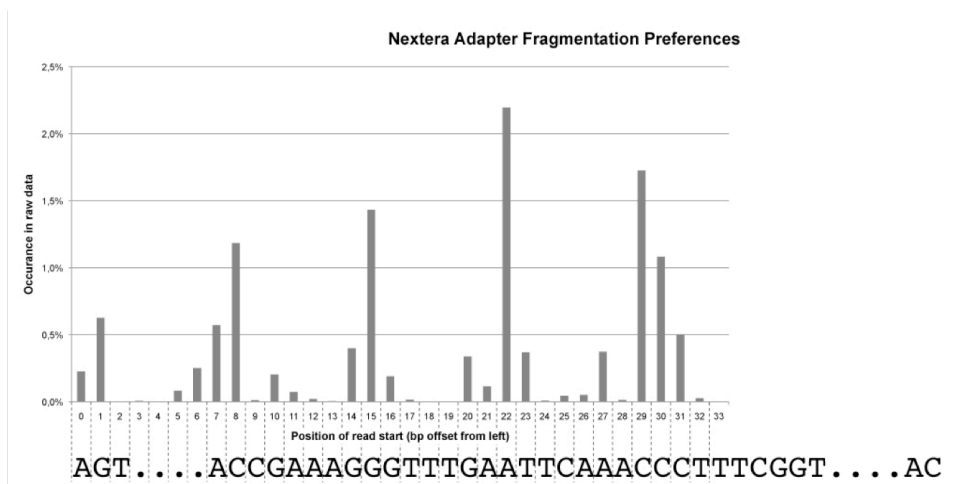



**Figure S4**

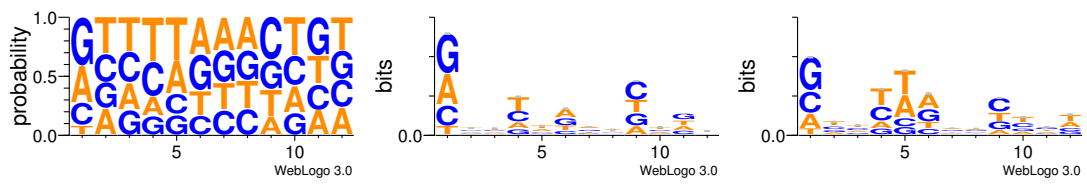

1. Goryshin, I.Y., Miller, J.A., Kil, Y.V., Lanzov, V.A. & Reznikoff, W.S. Tn5/IS50 target recognition. *Proc Natl Acad Sci U S A* **95**, 10716-21 (1998).
2. Adey, A. et al. Rapid, low-input, low-bias construction of shotgun fragment libraries by high-density in vitro transposition. *Genome Biol* **11**, R119.
